# Supplementary material
Source: publisher figshare collection journal article supplement (https://tandf.figshare.com/ndownloader/files/13458557)
Supplement: Supplementary file 1 [file 13458557]

**Supplementary Material**

| **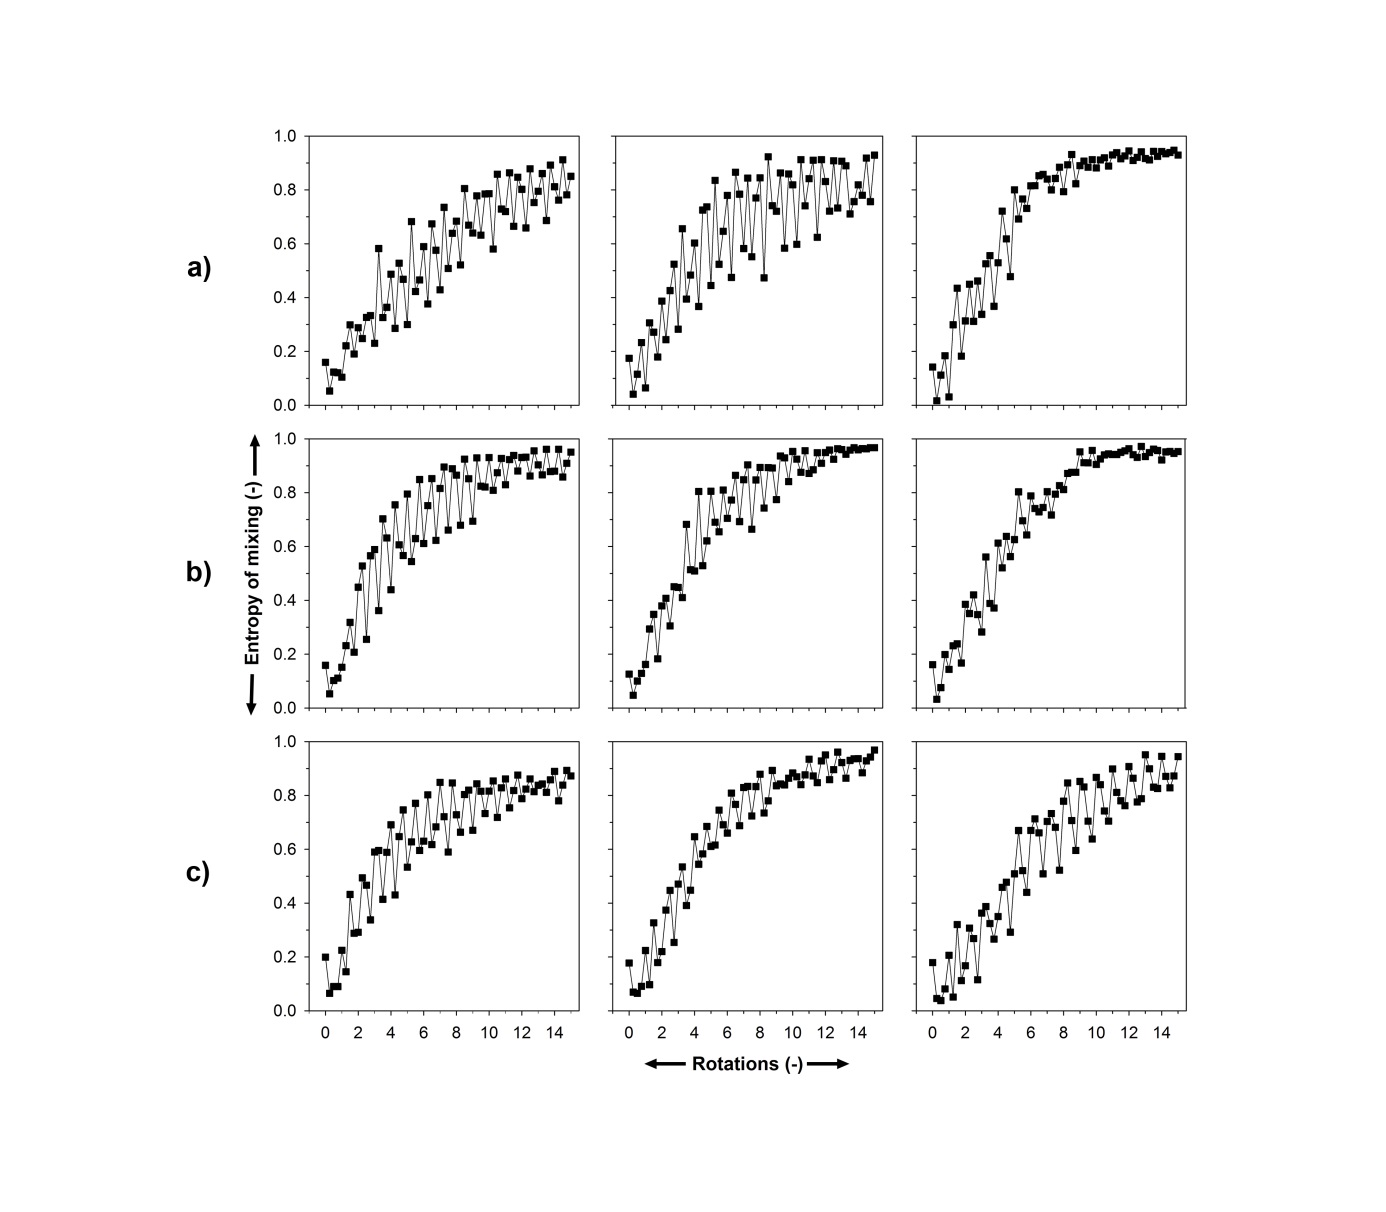** |
| --- |
| **Figure S1.** Scatter plot of the left segment for the fill levels a) 60% ,b) 70% ,c) 80% |

| **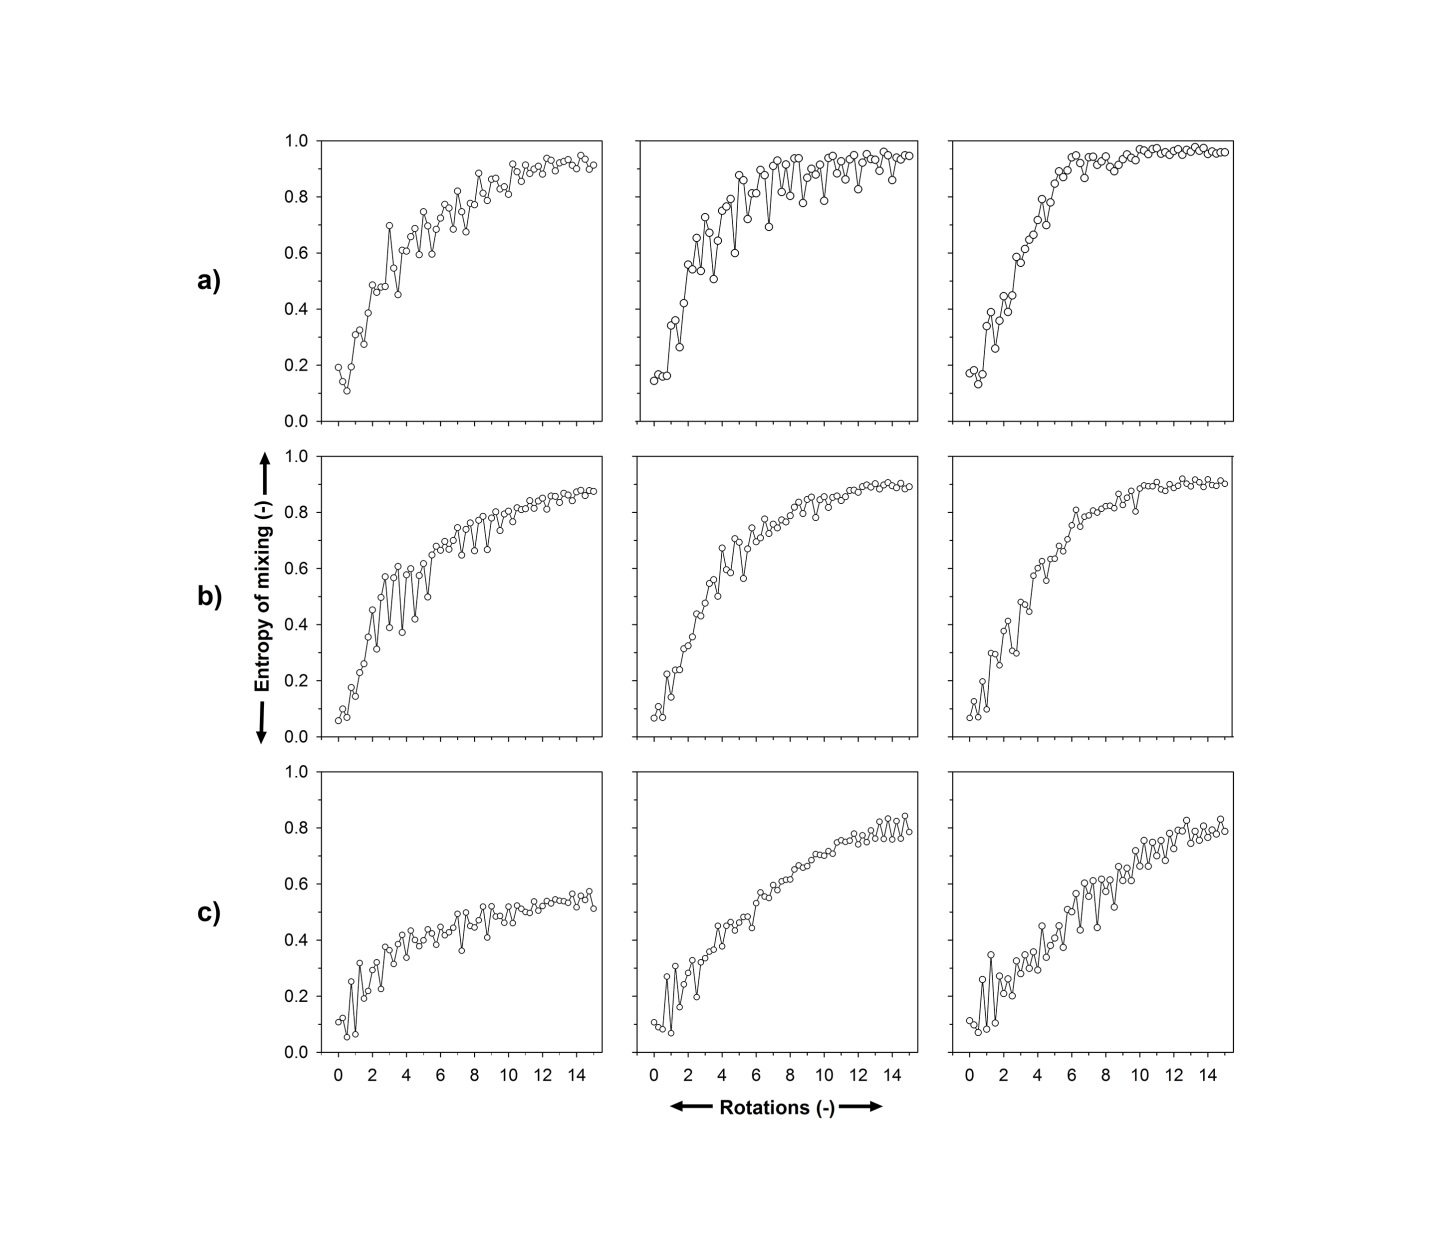** |
| --- |
| **Figure S2.** Scatter plot of the centre segment for the fill levels a) 60% ,b) 70% ,c) 80% |

| **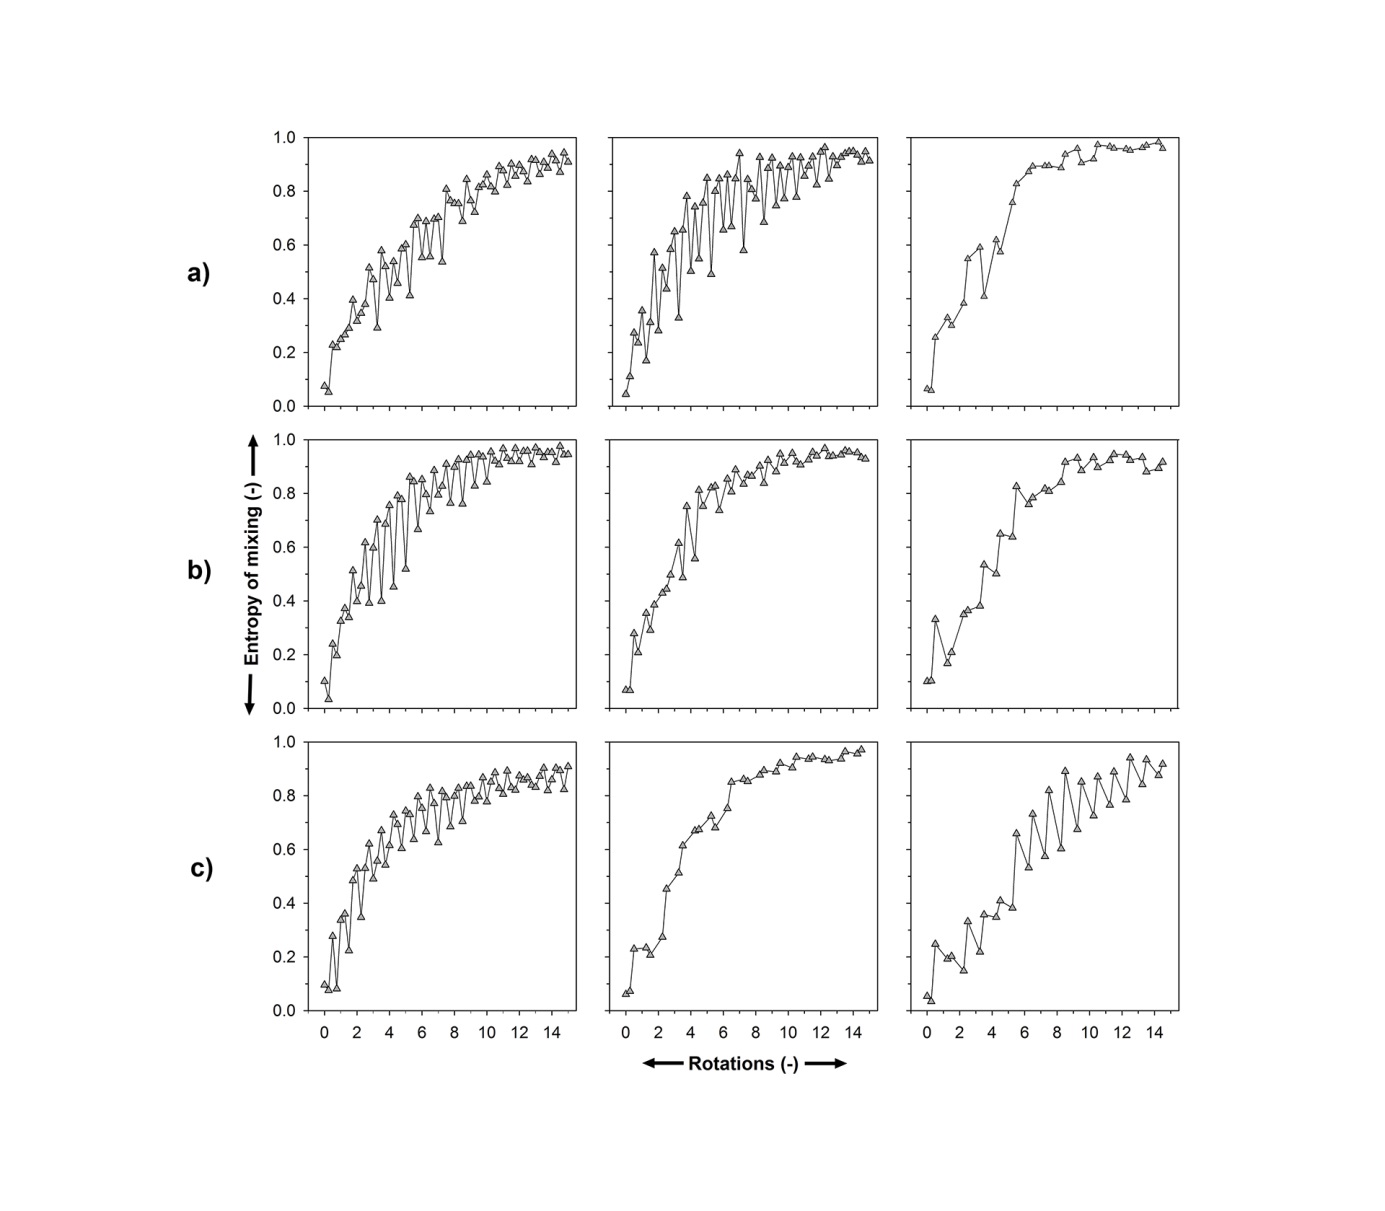** |
| --- |
| **Figure S3.** Scatter plot of the right segment for the fill levels a) 60% ,b) 70% ,c) 80% |
